# Supplementary material for: Model physics and chemistry causing intermodel disagreement within the VolMIP-Tambora Interactive Stratospheric Aerosol ensemble
Source: Copernicus journal article supplement (doi:10.5194/acp-2020-883), 2020-09-14
Supplement: Supplementary file [file acp-2020-883-RC1-supplement.pdf]

## Review of Clyne et al.

This paper discusses results from preparatory multi-model simulations done as part of the VolMIP project, in particular, simulations of the Tambora 1815 eruption. These results are very useful for understanding where the inter-model differences come from when models are presented with a large stratospheric injection. The authors carefully identify various physical and chemical processes producing those differences, and this represents a great improvement, as the authors point out, compared to the similar Marshall et al. (2018) study, which left some questions unanswered. This paper is therefore extremely interesting and full of information, and it's going to be very useful for the field, so it's a perfect fit for ACP. I have various comments due to the length of the manuscript that I believe would be useful to address to make the manuscript even more useful and clear to the reader.

### Major comments:

**Introduction:** the introduction dives straight into discussing the VolMIP and ISA-MIP protocols, but gives little to no context. I understand that, for experts in the field, it's irrelevant, but since it's a good introductory paper for the issue of model differences in volcanic eruption simulations, I would suggest some paragraph explaining the motivation for running the experiment, and some further description for the Tambora event.

**II. 224-227:** I'm not really sure I agree with this conclusion (or maybe I misunderstood it). This is akin to saying that 15% of the SO<sub>2</sub> is not converted into stratospheric sulfate aerosol and is instead removed directly. Considering the height of injection, I find this a bit hard to believe, nor do I think the authors have proven this convincingly (and it would be hard to prove, since it would require looking carefully at the 3D strat-trop exchange of SO<sub>2</sub>, or looking at direct SO<sub>2</sub> deposition). Notwithstanding the differences between impulsive injections like this case and sustained injections as in the case of geoengineering simulations, it is not even very consistent with previous findings (see Visioni et al. (2018) for a CCM and a CTM, and Visioni et al. (2020) for CESM(WACCM)) where all SO<sub>2</sub> was converted.

Overall, I just don't think the phrase is true, and the fact that (no) "more than 4 TgS is removed before the peak value of global stratospheric sulfate is reached" does not mean that, but rather that some SO<sub>4</sub> is removed before the peak (which is to be expected). Unless the authors can prove otherwise.

**I. 237:** A similar note to what I said above. By "Sulfur" what do the authors mean? If they mean aerosols, then it makes sense. If they mean only or also SO<sub>2</sub> (as the conclusion to the paragraph above implies) then I don't see any proof of that, but it is an important distinction!

**I. 245:** The phrase "CESM-WACCM and UM-UKCA produce the smallest *Reff*, with values never exceeding 0.5 μm" is a bit in contrast with what previously stated in line 230, where the cause for the increased burden in CESM and UM-UKCA is attributed to the better representation of mid-atmospheric dynamics (assuming that means that the stronger upwelling and confinement in the tropical stratosphere are "correct"). But here it is stated that the two models have the lowest radii, which is a much more straightforward explanation for why the burden is higher. Smaller particles result in less gravitational settling, thus increasing the lifetime (see, for instance, Visioni et al. (2018) Fig. 5 and 7). If the confinement is stronger, particles tend to grow more and thus settle quicker. So overall, the increased burden is much more likely due to these microphysical differences than to dynamical ones (as is also discussed below in Section 4.1).

**I. 444:** I find it a bit puzzling that there is no mention in the list of "Other model uncertainties" of the possible differences in self-lofting resulting from the stratospheric heating produced by the

sulfate aerosols. Together with large-scale dynamical differences discussed in 4.3.2, I would assume that such a large burden would result in large heating rates and thus in an increase in  $w^*$  compared to unperturbed conditions. Are pre-eruption residual vertical velocities in the tropical pipe comparable between models? And what about heating rates/perturbed  $w^*$ ? It could be that not all models have calculated the transformed eulerian means quantities, which might make this comparison hard to do. If they did (or even if just a few of the models, like CESM and UM-UKCA, for which the authors can't find a clear explanation for the differences) then it would be extremely interesting to show a profile of  $w^*$  in the tropical pipe. If not, it would be good to at least compare the temperature differences (heating rates are probably more problematic than  $w^*$ ) in the stratosphere and discuss the possibility that the differences are important.

**I. 471 and following:** I'm sorry to say this entire paragraph is utterly confusing to me. I will try to make sense of it, but I suggest a thorough checking by the authors. First, I assume the authors mean "southern" hemisphere. Second, I would say that the injection of  $\text{SO}_2$  happens inside the tropical pipe, it doesn't "go" there. But then, right after, the authors say that the aerosols move "towards the winter pole" which I honestly don't know what it's supposed to mean. And in what sense it "drains" the tropical pipe? I don't understand the following phrase either, about the stratosphere "depth". The tropopause is lower, sure, but I don't get why that would be the explanation for why the AOD moves poleward. And then, see following comment.

**I. 474:** "Aerosols are removed from the high latitudes by tropopause folding" this is a very strong assertion, not proven by the authors for these simulations nor backed up by the literature, as far as I'm aware. Happy to be proven wrong. In general, both for ozone and for aerosols, tropopause folding is *one of the* possible mechanisms, surely not the only one, and I'm not even sure about how predominant it is compared to strat-trop exchange and, for aerosols, gravitational settling. The references I know of (again, mostly for ozone) do not indicate it as the predominant form of contribution to tropospheric air from the tropopause (see for instance Oltmans et al. (1989); Holton et al. (1995); Wimmers et al. (2003); Sprenger et al. 2003)

**Figure D1-D2 and Appendix D:** these figures are very complicated, but that is not the main problem to me. They could be really important, but it feels like the rationale behind using SOM is not explained satisfactorily. Why shouldn't you do a similar analyses using a Dynamical Mode Decomposition instead, or a simple EOF? SOM lets the algorithm decide what the bases are, without a proper physical meaning. These bases are not necessarily orthogonal, so for instance it's not immediate what the differences between the first and the second pattern are. The authors should explain a bit more (feel free to put it in the supplementary) what SOM is and why it was chosen. This is not something everybody would be familiar with in this field, so it might help people understand what the authors mean.

### Minor comments:

**I 47:** The ISA acronym needs to be explained here.

**I 49:** I don't really follow what "to effect" means in this context, so the phrase seems a bit obscure to me.

**I 51:** there are word missing. I guess the author wanted to say "since the experiment is designed..."

**I 55:** this part is also a bit hard to understand, and very long. I am only able to understand what HERSEA is because I already know about it, but that "but for the HERSEA experiment" is otherwise a bit obscure (also, the acronym is not explained). I would suggest a stop after 20<sup>th</sup> century, and then a sequent phrase saying: "In most ISA-MIP experiments, the models run..."

**I 56:** I'd remove the word "ensemble" here

- I 58: “dependence” from initial conditions, or “differences due to” initial conditions
- I 59: the ISA-MIP protocol prescribed for Pinatubo in Timmreck et al. (2018) a range of SO<sub>2</sub> emissions from 10 to 20 Tg-SO<sub>2</sub>, with a “medium” injection of 14 Tg. The numbers given here result in a low of 14 and a high of 23 Tg. I’d suggest resolving this inconsistency.
- I. 122: proportional “to”
- I. 209: I’m not really sure what is intended by “elevated”, used here and elsewhere (at least three times in this paragraph). Is it intended as “in the stratosphere”? Or as “high”, “large”?
- I. 372: I don’t think “in number” is necessary.
- I. 407: The version used in Mills et al. (2017) is the same as the one used here, so for consistency it should be called the same (CESM-WACCM)
- I. 476: please see comments about figure D1.
- I. 509: This is a very interesting observation, quite in line with a similar effect observed in Visioni et al. (2018).
- I. 607: “physical and chemical processes”
- I. 625: “aerosol layer” or “aerosols are spread”. “Rather” than a more...

**Figure 4:** hard to read, should be enlarged

**Figure 7:** it would be better if the scales were modified so as to include both lines in all panels. Otherwise the peak for the dashed line can’t be evaluated.

## References

- Holton, J. R., Haynes, P. H., McIntyre, M. E., Douglass, A. R., Rood, R. B., and Pfister, L. (1995), Stratosphere-troposphere exchange, *Rev. Geophys.*, 33( 4), 403– 439, doi:[10.1029/95RG02097](https://doi.org/10.1029/95RG02097).
- Oltmans, S.J., Raatz, W.E. & Komhyr, W.D. On the transfer of stratospheric ozone into the troposphere near the north pole. *J Atmos Chem* 9, 245–253 (1989).  
<https://doi.org/10.1007/BF00052835>
- Sprenger, M., Croci Maspoli, M., and Wernli, H. (2003), Tropopause folds and cross-tropopause exchange: A global investigation based upon ECMWF analyses for the time period March 2000 to February 2001, *J. Geophys. Res.*, 108, 8518, doi:[10.1029/2002JD002587](https://doi.org/10.1029/2002JD002587), D12.
- Visioni, D., Pitari, G., Tuccella, P., and Curci, G.: Sulfur deposition changes under sulfate geoengineering conditions: quasi-biennial oscillation effects on the transport and lifetime of stratospheric aerosols, *Atmos. Chem. Phys.*, 18, 2787–2808, <https://doi.org/10.5194/acp-18-2787-2018>, 2018.
- Visioni, D., Slessarev, E., MacMartin, D., Mahowald, N. M., Goodale, C. L., and Xia, L.: What goes up must come down: impacts of deposition in a sulfate geoengineering scenario, *Environmental Research Letters*, 15(9), <http://iopscience.iop.org/10.1088/1748-9326/ab94eb>
- Wimmers, A. J., Moody, J. L., Browell, E. V., Hair, J. W., Grant, W. B., Butler, C. F., Fenn, M. A., Schmidt, C. C., Li, J., and Ridley, B. A. (2003), Signatures of tropopause folding in satellite imagery, *J. Geophys. Res.*, 108, 8360, doi:[10.1029/2001JD001358](https://doi.org/10.1029/2001JD001358), D4.
